# Supplementary material for: Acid-modified clays as green catalysts for the hydrolysis of hemicellulosic oligosaccharides
Source: Royal Society of Chemistry journal article supplement (doi:10.1039/c5cy00195a), 2015-01-01
Supplement: c5cy00195a1.pdf [file c5cy00195a1.pdf]

# **Acid-modified clays as green catalysts for the hydrolysis of hemicellulosic oligosaccharides**

**Léa Vilcocq,<sup>a</sup> Vitor Spinola,<sup>a</sup> Patricia Moniz,<sup>b</sup> Luís C. Duarte,<sup>b</sup> Florbela Carvalheiro,<sup>b</sup> Cesar Fernandes,<sup>a,c</sup> and Paula Castilho<sup>\*a</sup>**

## **Electronic Supplementary Information**

**1 Table, 1 Figure**

Figure S1.

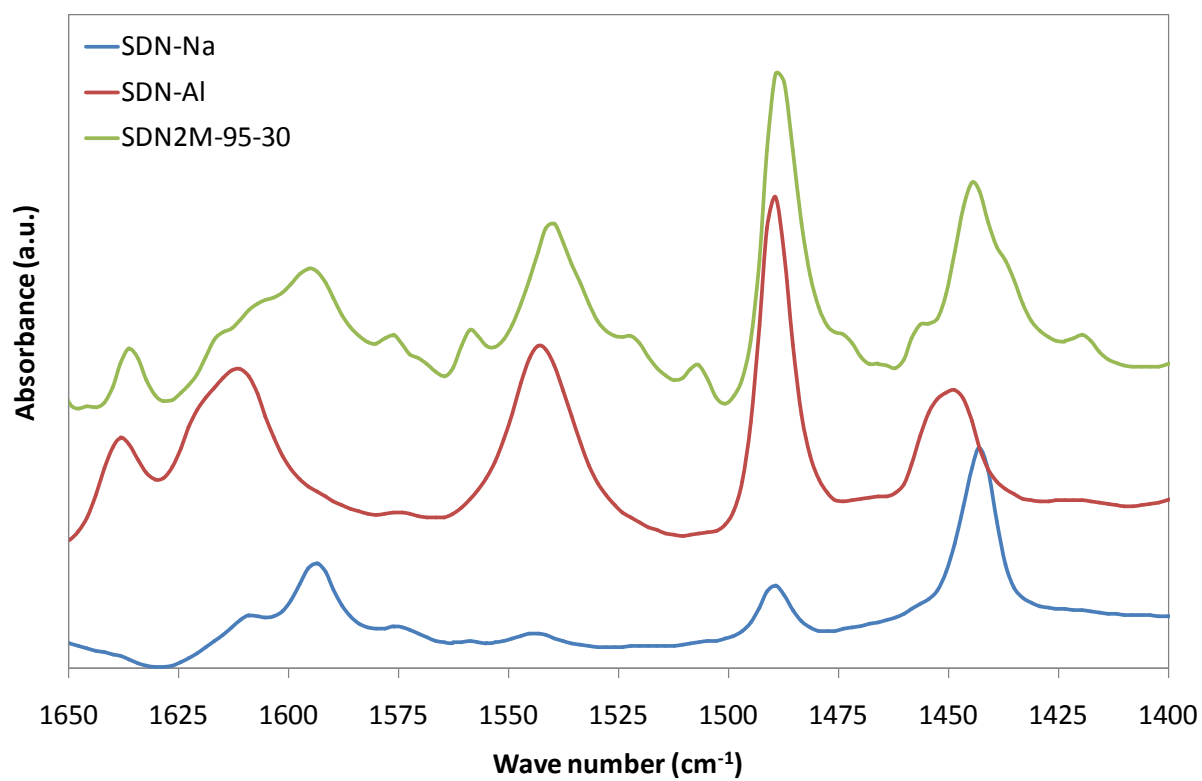

FTIR spectra of adsorbed pyridine over activated clays.

**Table S2.** Final carbon balances during the maltose hydrolysis test.

| <b>Catalyst</b> | <b>Carbon balance (%)<sup>a</sup></b> |
|-----------------|---------------------------------------|
| SDN1M           | 100.1                                 |
| SDN2M           | 101.5                                 |
| SDN6M           | 99.5                                  |
| SDN-Al          | 85.1                                  |
| SDN-Na          | 64.4                                  |

<sup>a</sup> The carbon balance is calculated from maltose, glucose, fructose and unknown sugar concentrations.
